# Supplementary material for: Mark-release-recapture experiment in Burkina Faso demonstrates reduced fitness and dispersal of genetically-modified sterile malaria mosquitoes
Source: PubMed Central journal article supplement (PMC8831579; doi:10.1038/s41467-022-28419-0), 2022-02-10
Supplement: 41467_2022_28419_MOESM1_ESM.pdf [file 41467_2022_28419_MOESM1_ESM.pdf]

Distance from release, d (m)

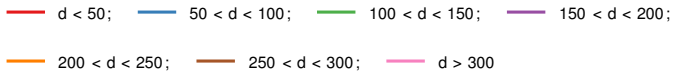

DSM

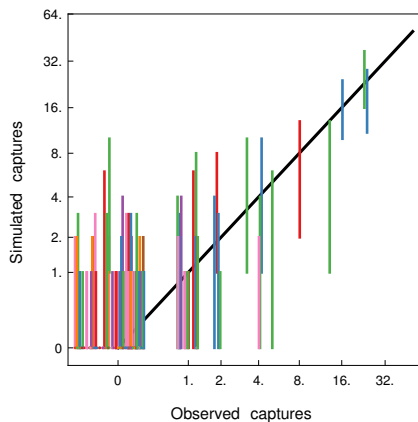

sibling

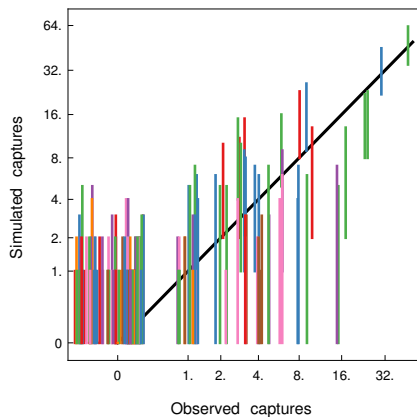

DSM

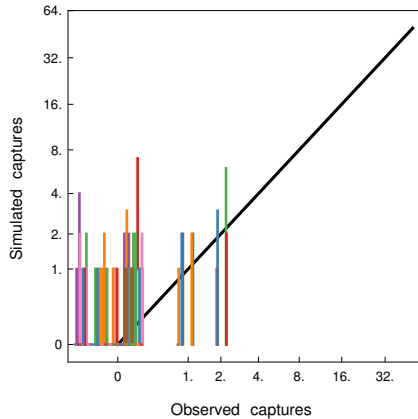

sibling

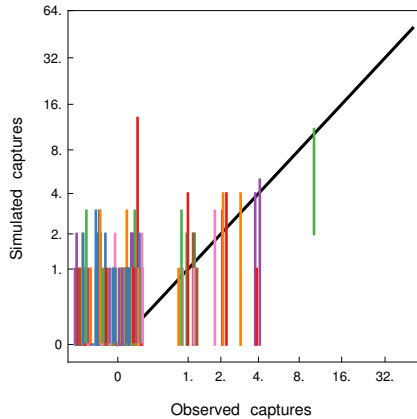

**Supplementary Fig. 1. An assessment of the explanatory power of the diffusion model with respect to the swarm recapture data (top row) and the PSC (Pesticides Spray Catches) recapture data (bottom row).** In each case (swarm or PSC), a posterior distribution of the model parameters was inferred from the corresponding set of recapture data. One hundred data sets were generated by sampling the posterior distributions, and the coloured vertical lines represent the central 95% quantiles of these simulated data plotted against the actual recapture data. The line colours show the distances of the samples from the release location. The diagonal black lines demark a perfect correspondence between simulated and observed data ( $y=x$ ). For each simulated data set, we computed the coefficient of determination ( $R^2$ ) against the black line (by the formula  $1 - \frac{\sum(x_i - y_i)^2}{\sum(x_i - \bar{x})^2}$  where the  $y_i$ s are the simulated and  $x_i$ s the observed data).

(DSM: Dominant Sterile Male)

Daily survival

Diffusion coefficient (000s  $m^2 day^{-1}$ )

Population density (mos.  $ha^{-1}$ )

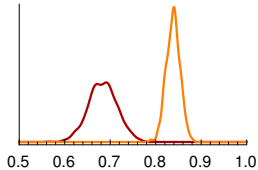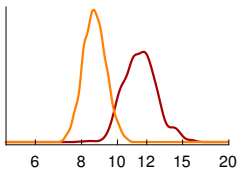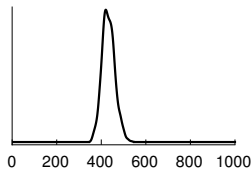

— Ag(DSM)2 males    — Sibling males    — Bana population

**Supplementary Fig. 2. Bayesian posterior estimates of population size, survival, and diffusion, inferred from the swarm recapture data.** Estimates of survival and mobility were inferred from the spatio-temporal distribution of swarm recaptures of Ac(DSM)2 males (dark red) and their non-transgenic siblings (orange), whilst estimates of population size at the time of the release used the combined data (black). ((Ag(DSM)2: *Anopheles gambiae* Dominant Sterile Male)

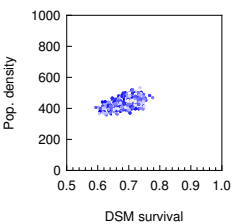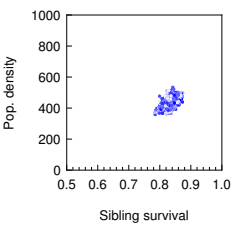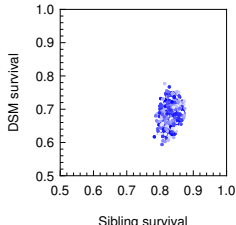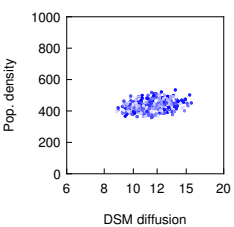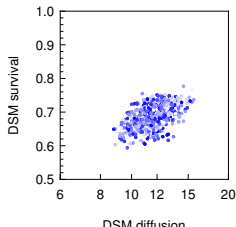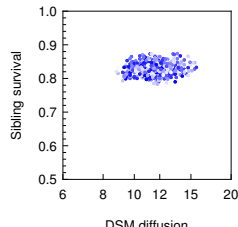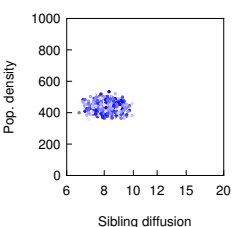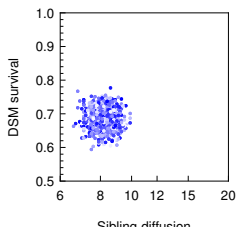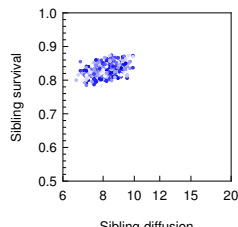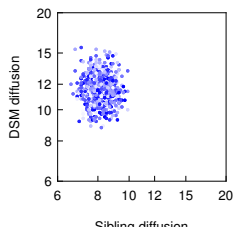

**Supplementary Fig. 3. A visualisation of the posterior distribution to investigate covariance between the inferred parameters.** The plots show 800 samples of the posterior distribution for each pairwise combination of model parameters. (DSM: Dominant Sterile Male; Pop: Population)

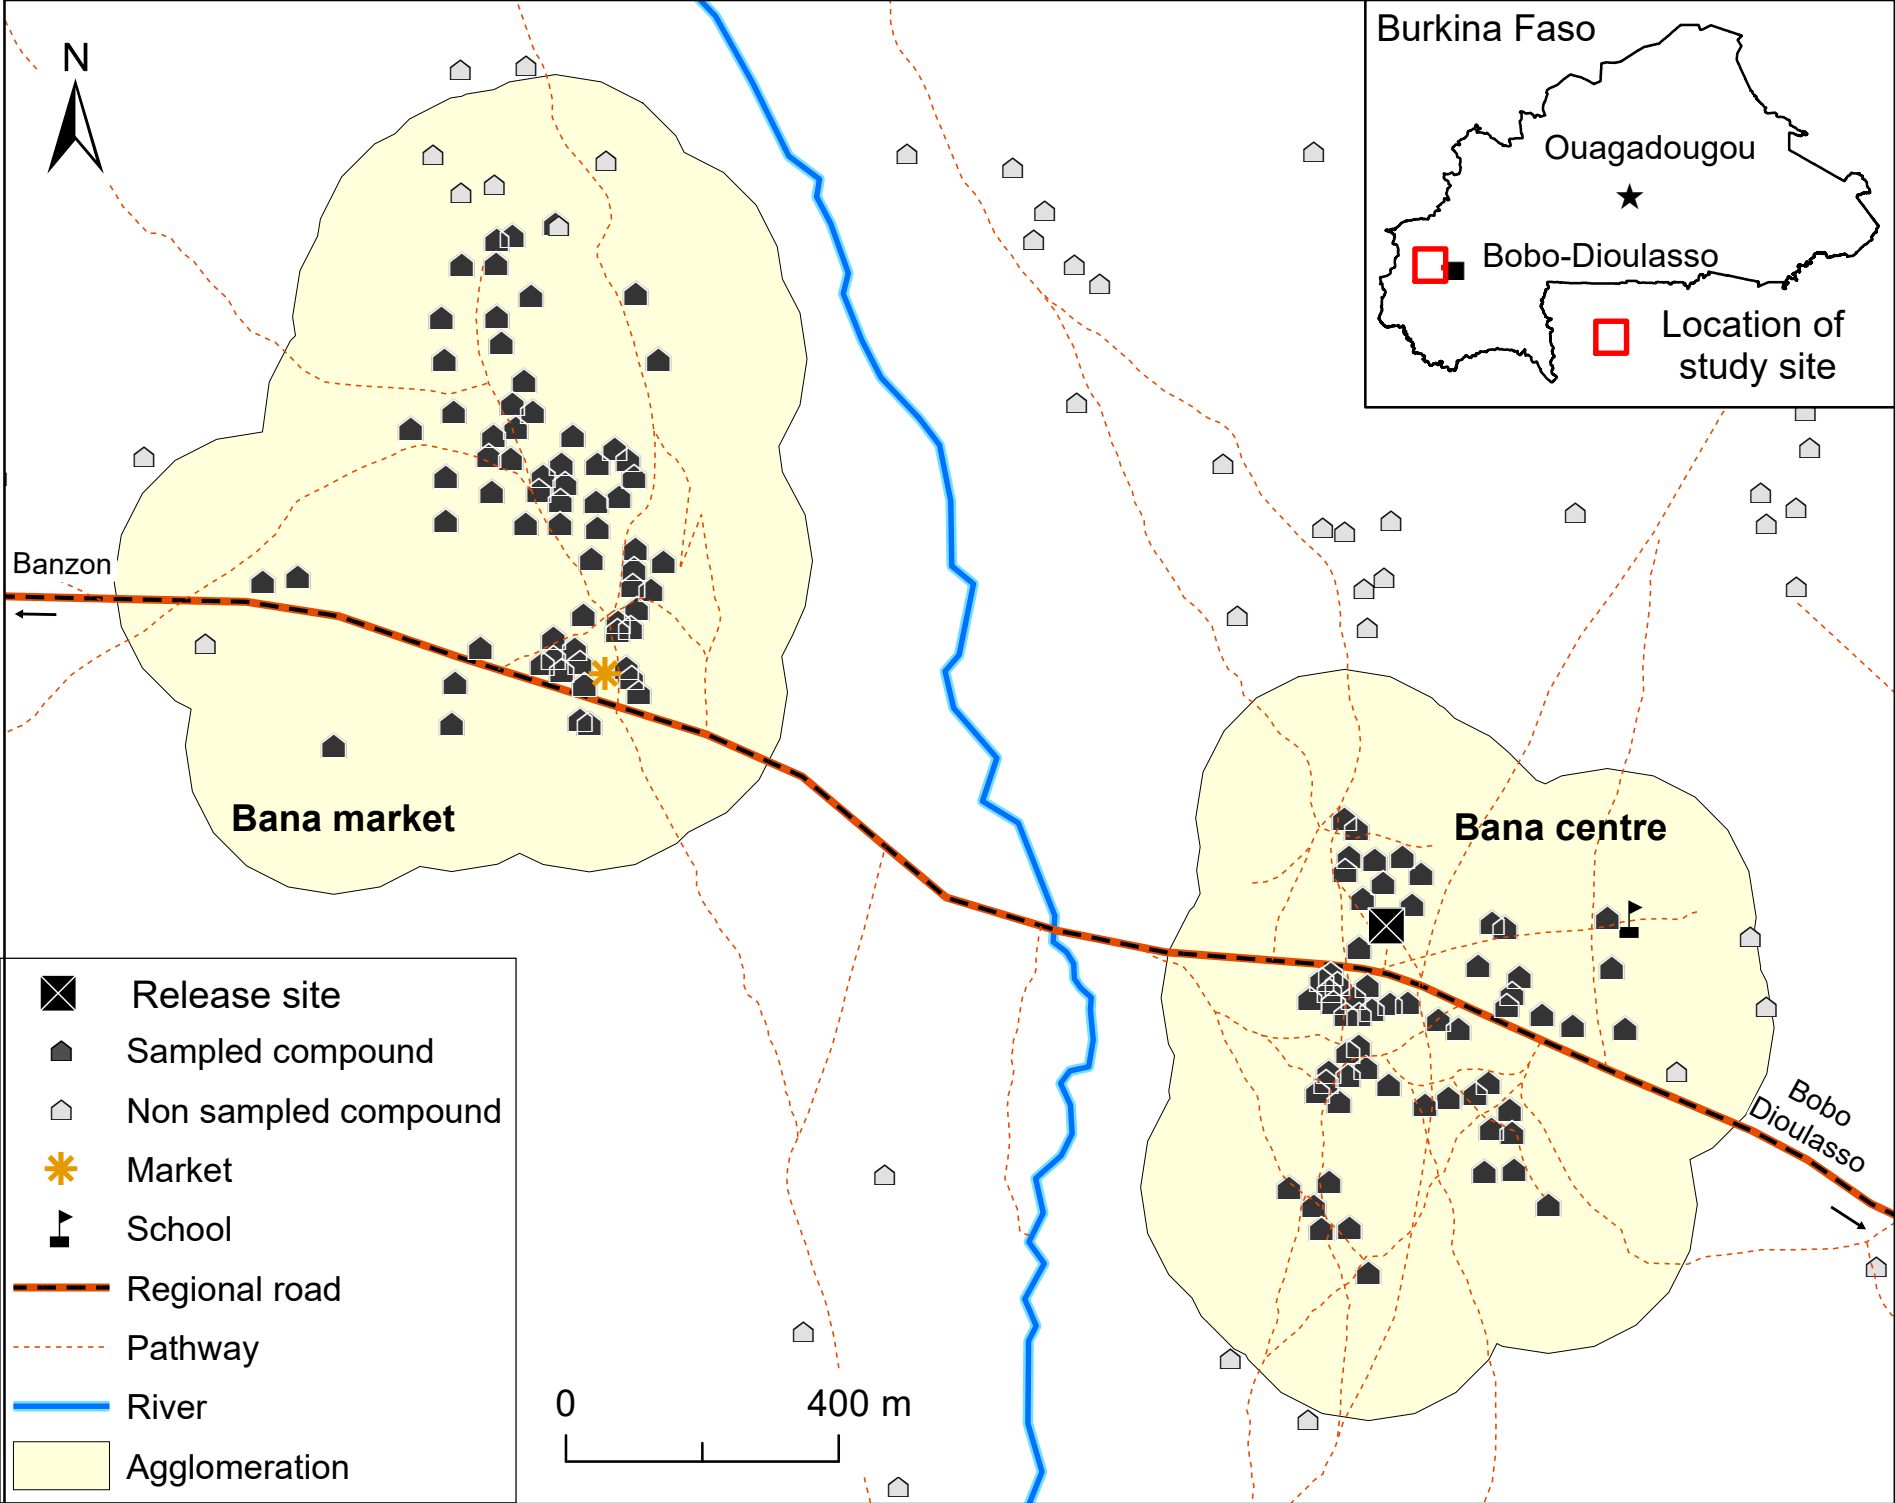

**Supplementary Fig. 4. Derived boundaries of the study villages.** Burkina Faso village agglomerations do not have administrative boundaries, so the boundaries shown here were derived by a kernel analysis. A top-hat kernel was applied to the locations of compounds that were sampled within the villages, with kernel width equal to the standard distance between compounds (the average distance from every compound to mean center of the agglomeration; 234m and 201m for Bana Market and Bana Village respectively). Each border is defined as the locus of points where kernel density falls to zero. (Map drawn using Arc GIS, version 10.8)



# BANA

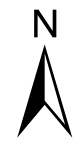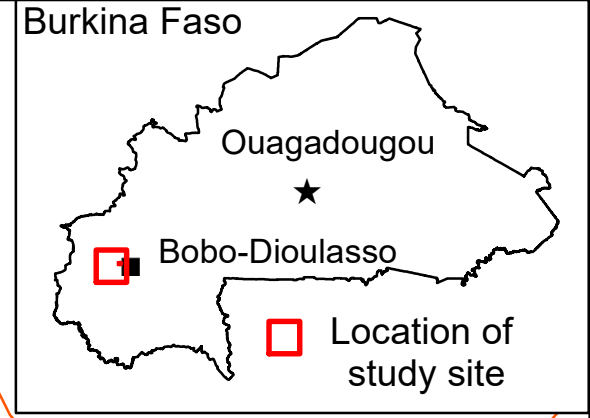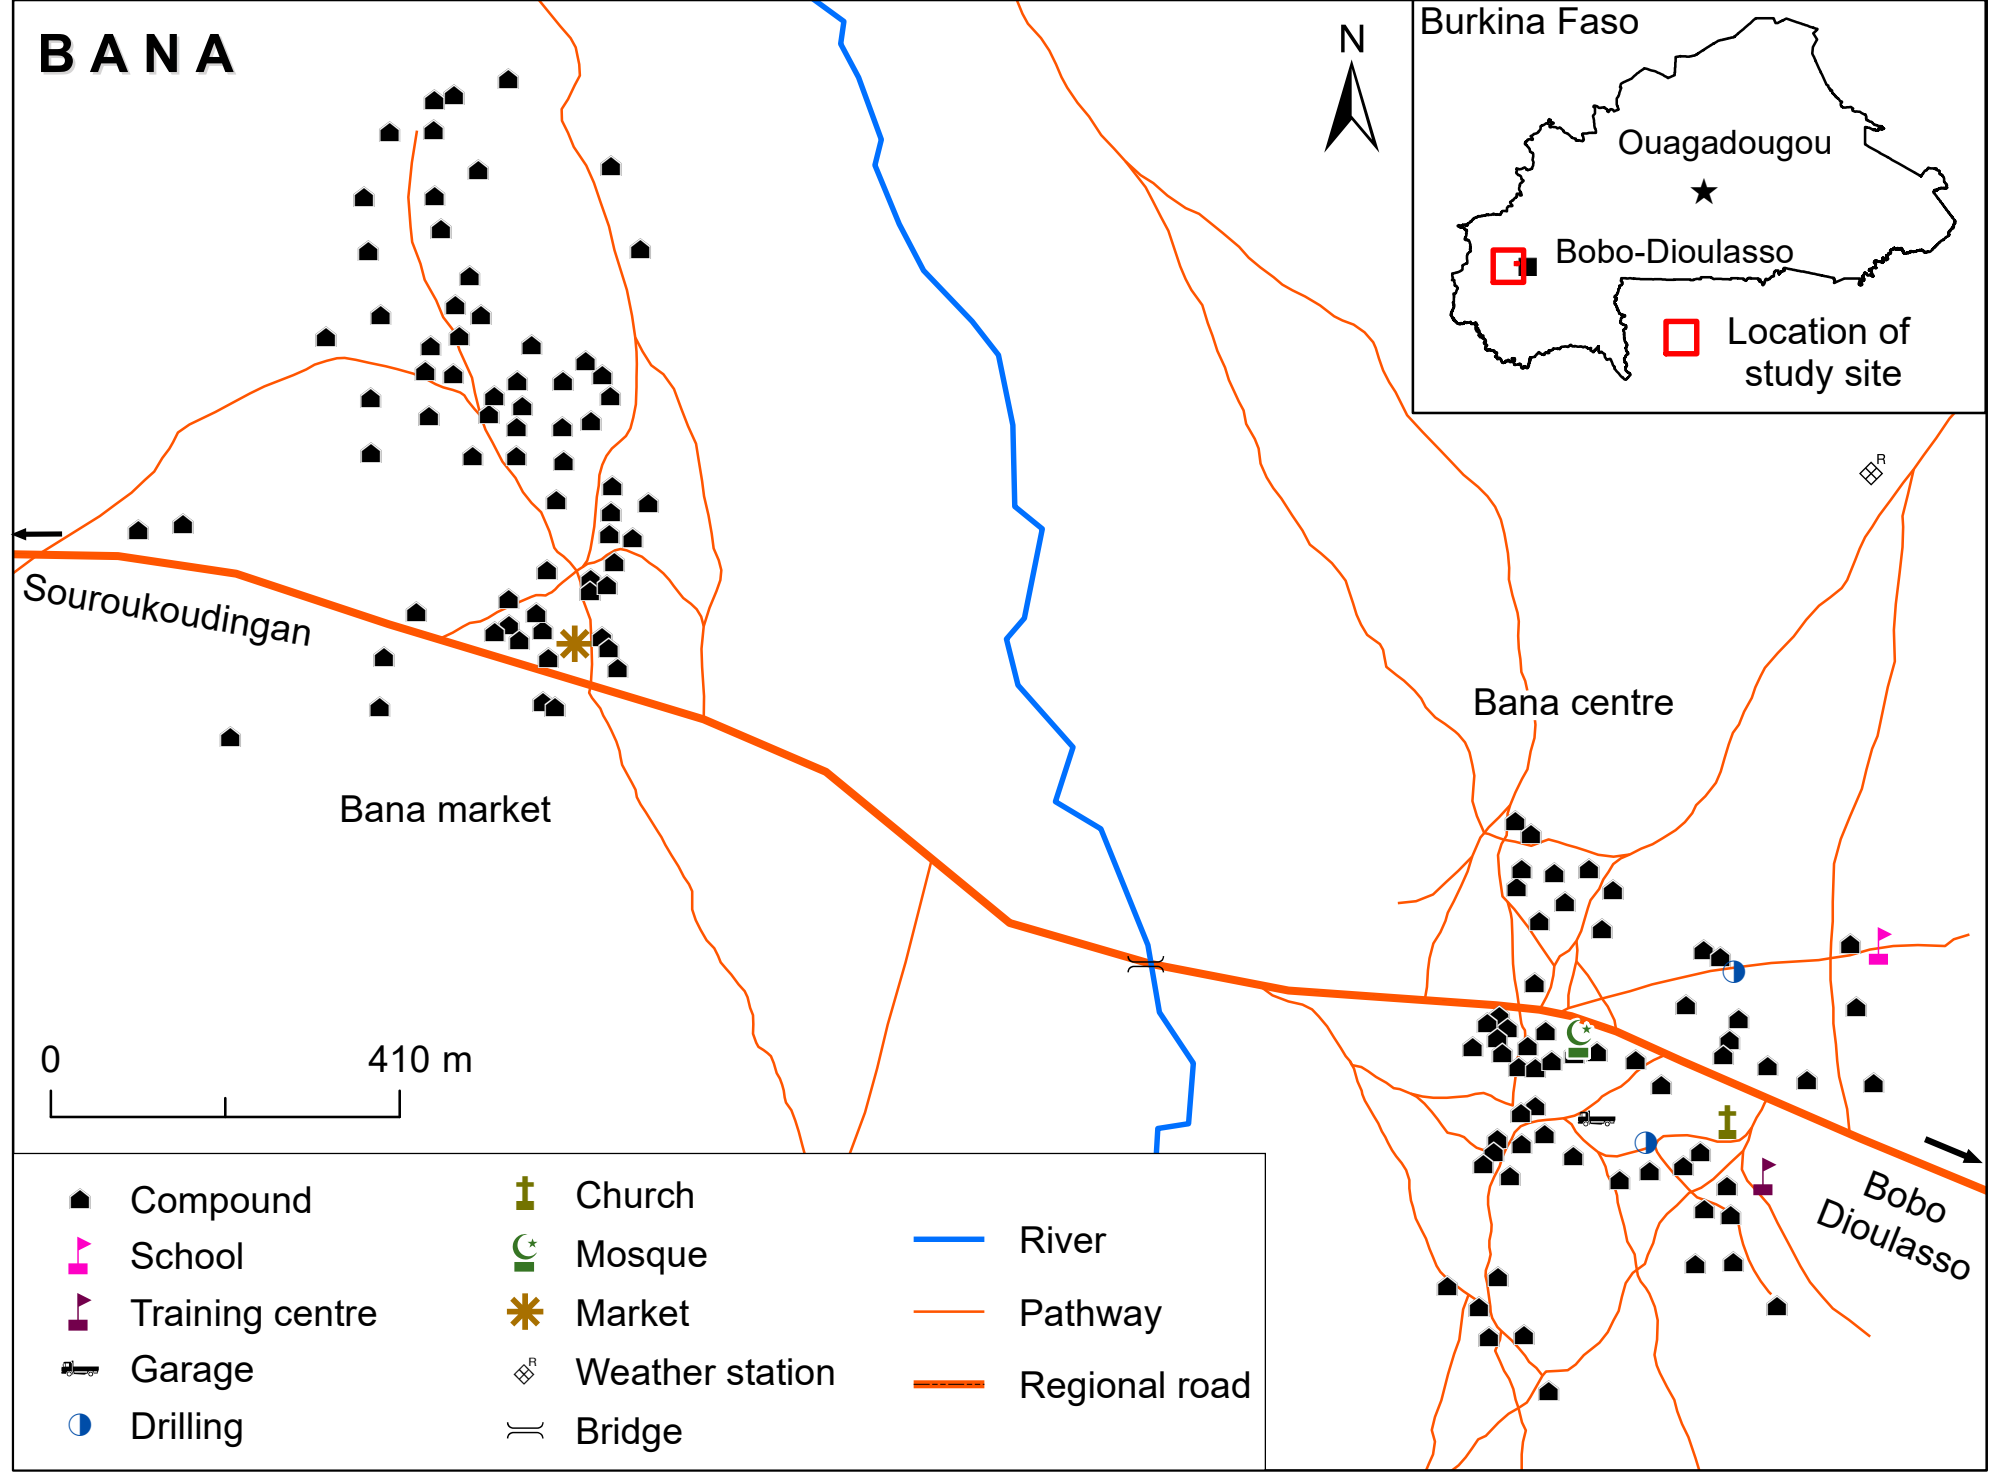

**Supplementary Fig. 5. Location of the release study site, the village of Bana in the Sudano-Sahelian ecological zone of Western Burkina Faso.** (Map drawn using Arc GIS, version 10.8)
